# Supplementary material for: Coastal Nitrogen Drives Respiration Quotient in the Southern California Bight
Source: Copernicus journal article supplement (doi:10.5194/egusphere-2025-2357), 2025-06-02
Supplement: Supplementary file 2 [file egusphere-2025-2357-supplement.pdf]

# Coastal Nitrogen Drives Respiration Quotient in the Southern California Bight

Allison R. Moreno<sup>1,2</sup>, Adam J. Fagan<sup>3</sup>, and Adam C. Martiny<sup>2,3</sup>

## Affiliations:

<sup>1</sup> Department of Ocean Sciences, University of California, Santa Cruz, CA, USA

<sup>2</sup> Department of Ecology and Evolutionary Biology, University of California, Irvine, CA, USA

<sup>3</sup> Department of Earth System Science, University of California, Irvine, CA, USA

## 1. Supplementary Information

### 1.1. Supplementary Figures

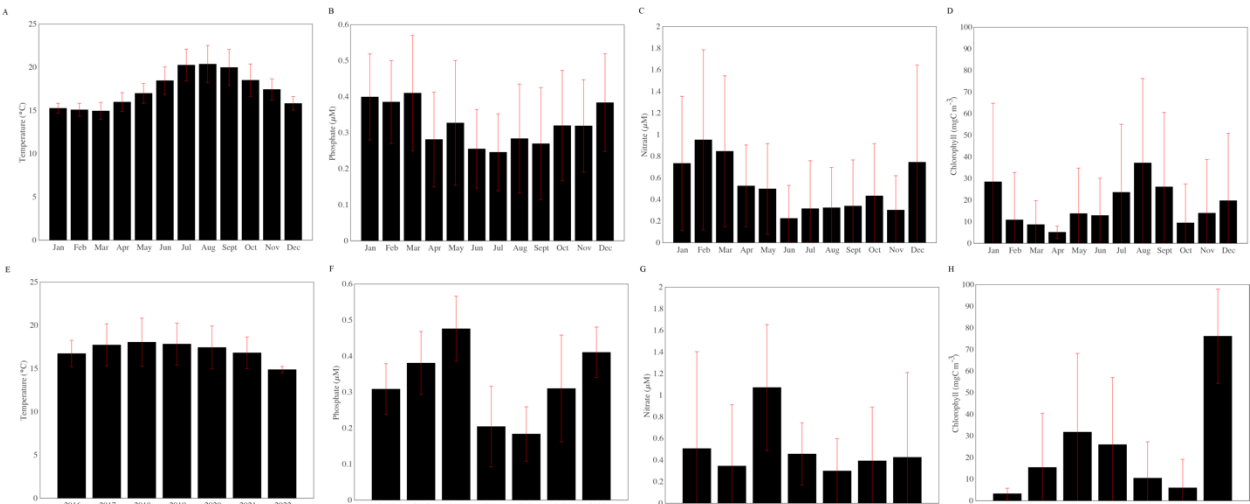

**Sup Figure 1.** Average monthly and annual environmental parameter trends. A/E. Temperature. B/F. Phosphate. C/G. Nitrate. D/H. Chlorophyll. Red lines represent the standard deviation from the average.

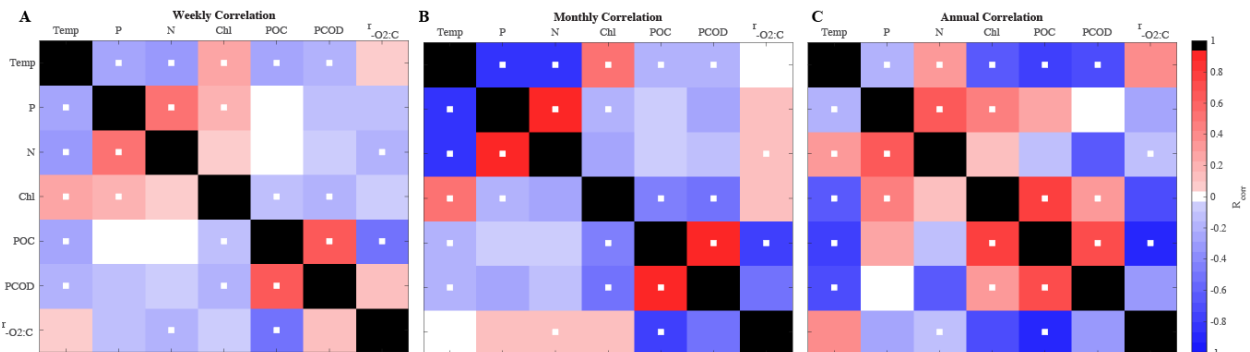

**Sup Figure 2.** Covariations between all physical, chemical, and biological parameters. A. Weekly correlations. B. Monthly correlations. C. Annual correlations.

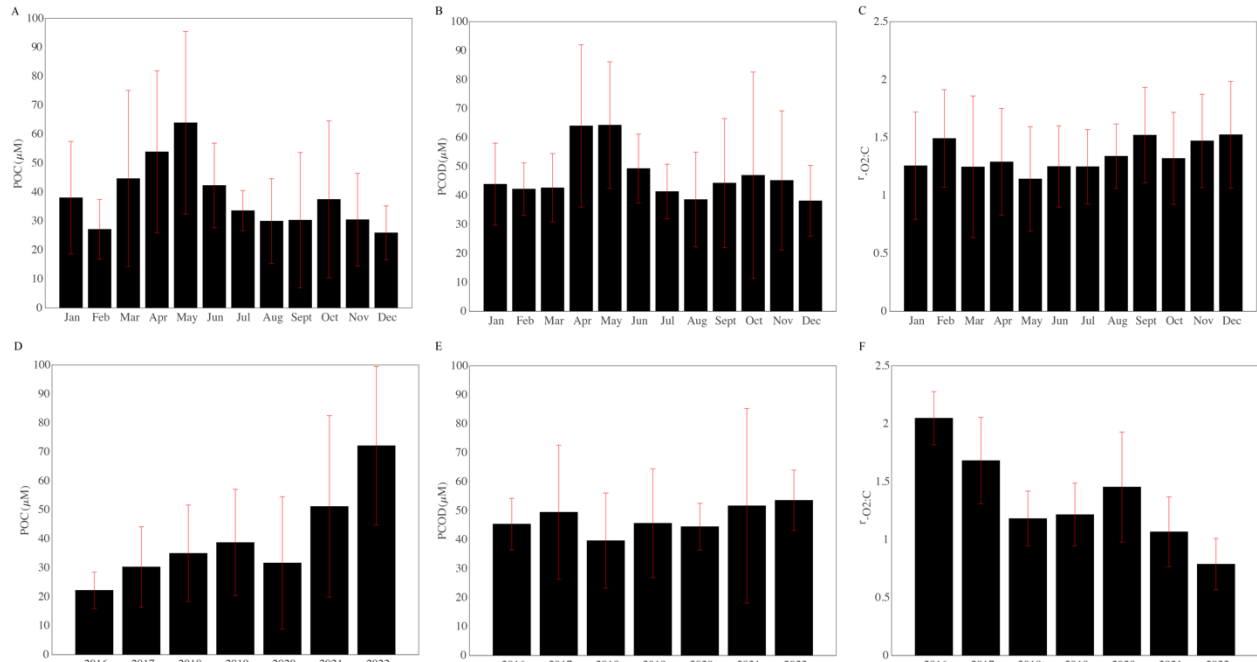

**Sup Figure 3.** Average monthly and annual particulate organic matter and ratio trends. A/D POC concentrations. B/E. PCOD concentration. C/F.  $r_{\text{O}_2:\text{C}}$ . Red lines represent the standard deviation.

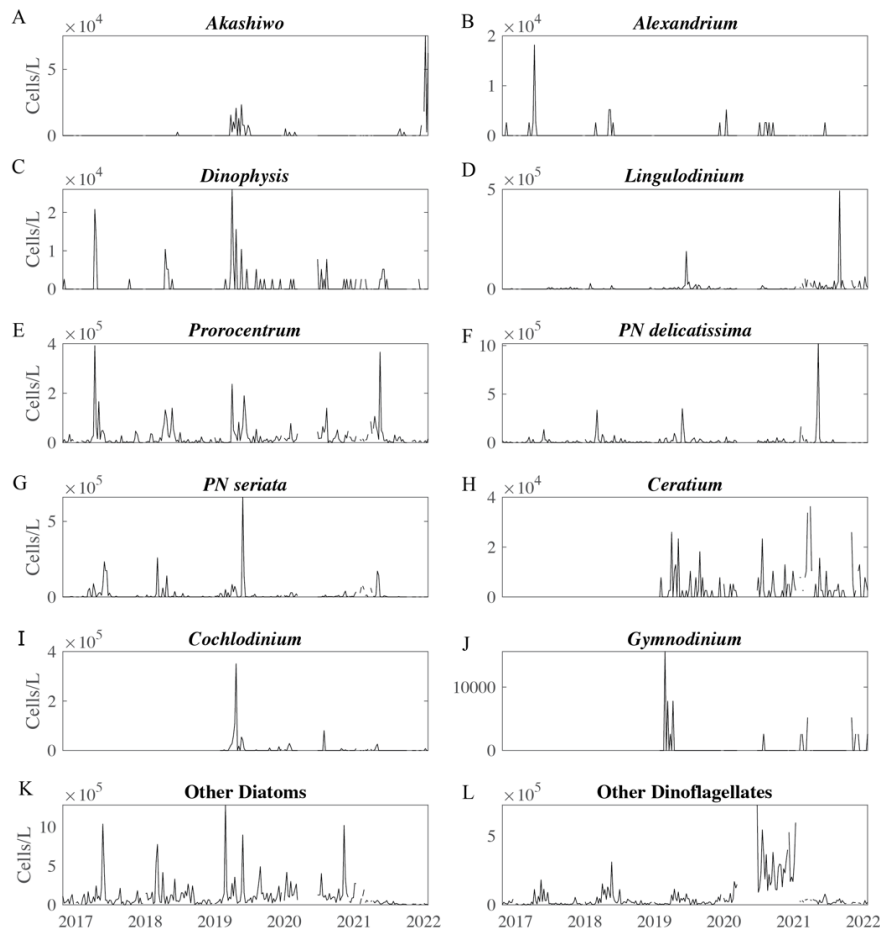

**Sup. Figure 4.** Primarily large phytoplankton (diatoms and dinoflagellates) abundance over time.

32

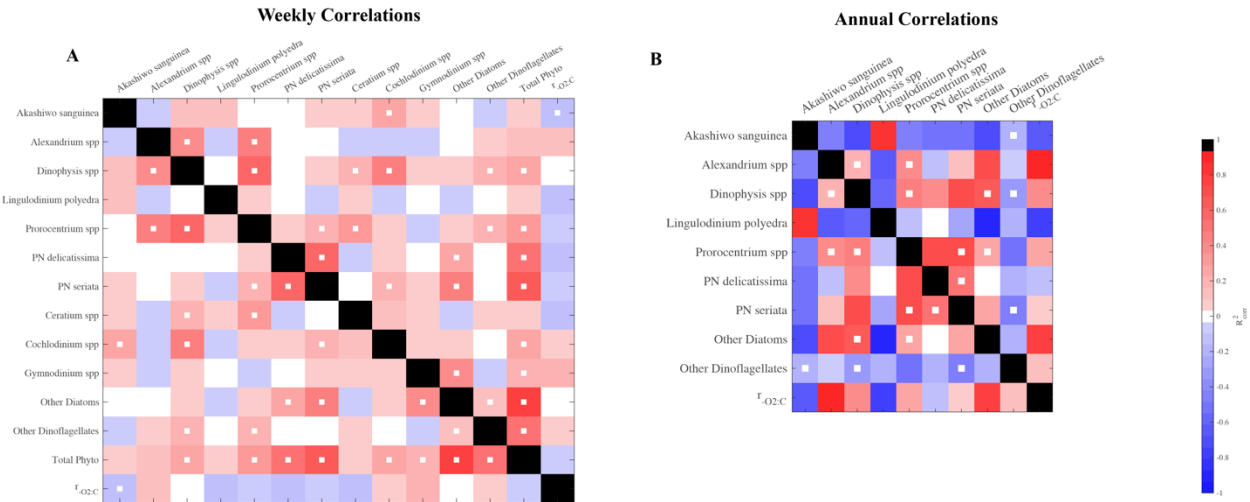

**Sup Figure 5.** Correlations between all large phytoplankton species and  $r_{O_2:C}$ . A. Weekly and B. Annual correlations. White squares represent statistically significant correlations (p-value ≤ 0.05).

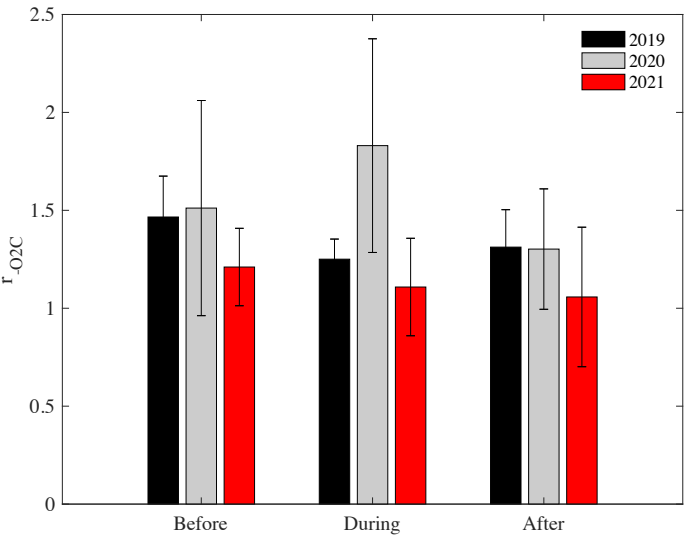

**Sup Figure 6.** Annual differences in  $r_{O_2:C}$  during the oil spill timeframes. Average  $r_{O_2:C}$  in 2019 (black), 2020 (grey), and 2021 (red). Error bars represent the standard deviation.
